# Supplementary material for: Ultrashort vertical-channel MoS2 transistor using a self-aligned contact
Source: PubMed Central journal article supplement (PMC10761794; doi:10.1038/s41467-023-44519-x), 2024-01-02
Supplement: 41467_2023_44519_MOESM1_ESM.pdf [file 41467_2023_44519_MOESM1_ESM.pdf]

1 **Supplementary Information for**

2 **Ultrashort vertical-channel MoS<sub>2</sub> transistor**  
3 **using a self-aligned contact**

4 Liting Liu<sup>1</sup>, Yang Chen<sup>1</sup>, Long Chen<sup>1</sup>, Biao Xie<sup>1</sup>, Guoli Li<sup>1,\*</sup>, Lingan Kong<sup>1</sup>,  
5 Quanyang Tao<sup>1</sup>, Zhiwei Li<sup>1</sup>, Xiaokun Yang<sup>1</sup>, Zheyi Lu<sup>1</sup>, Likuan Ma<sup>1</sup>, Donglin Lu<sup>1</sup>,  
6 Xiangdong Yang<sup>2</sup>, Yuan Liu<sup>1,\*</sup>

7 <sup>1</sup>Key Laboratory for Micro-Nano Optoelectronic Devices of Ministry of Education,  
8 School of Physics and Electronics, Hunan University, Changsha 410082, China.

9 <sup>2</sup>Institute of Micro/Nano Materials and Devices, Ningbo University of Technology,  
10 Ningbo, 315211, China.

11 \*e-mail: yuanliuhnu@hnu.edu.cn; liguoli\_lily@hnu.edu.cn

12

13

14

15

16

17

18

19

20

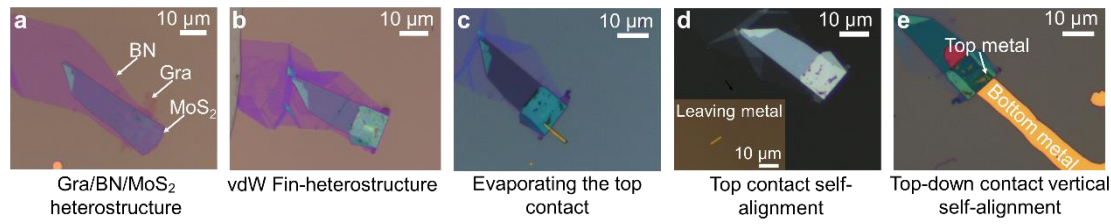

21

22 **Supplementary Fig. 1. The optical images of the fabrication process.** **a**, Stacking of  
 23 MoS<sub>2</sub>/BN/graphene heterostructure. **b**, Formation of vdW Fin-heterostructure. **c**,  
 24 Deposition of the top metal contact. **d**, Peeling off the folded heterostructure. **e**, Transfer of  
 25 the folded heterostructure to realize self-aligned vertical contact.

26

27

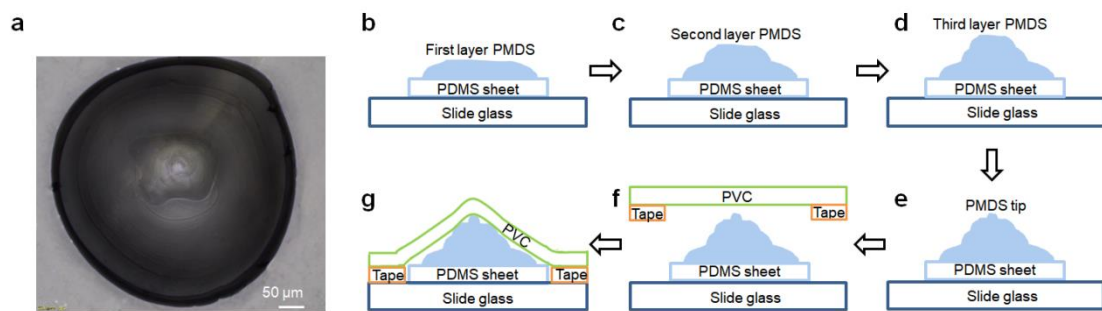

28

29 **Supplementary Fig. 2. The characterization and fabrication processes of PDMS tip.**

30 **a**, The image of the bumped PDMS stamp which used to fold the heterostructure. **b–g**, The  
 31 fabrication process of the PDMS tip, comprising six essential steps: **(b)** dropping first layer  
 32 PDMS liquid using tungsten needle with diameter of 2 mm, **(c)** dropping the second layer  
 33 PDMS liquid using the tungsten needle with diameter of 600 μm, **(d)** dropping the third  
 34 layer PDMS liquid using the tungsten needle with diameter of 50 μm, **(e)** dropping the fourth  
 35 layer PDMS liquid using the tungsten needle with diameter of 400 nm, **(f, g)** coating the  
 36 PVC layer on top of PDMS tip to enhance the adhesion force.

37

38

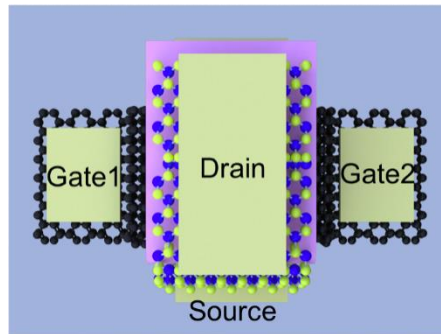

39

40 **Supplementary Fig. 3. The top view schematic of the self-alignment device.** During  
41 the folding process, the actual graphene gate extends to both sides of the folded  
42 heterostructure, forming two tails outside BN for gate contact (Gate 1 and Gate 2).

43

44

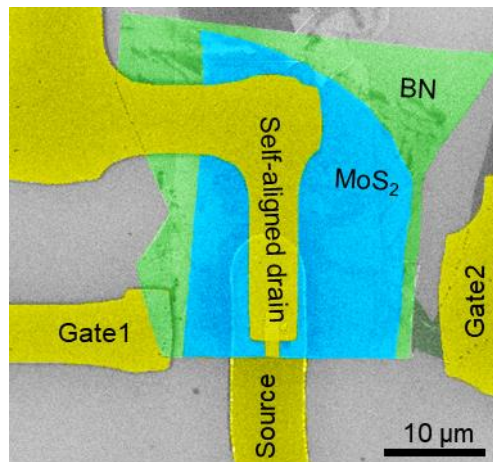

45

46 **Supplementary Fig. 4. False-colored SEM image of the device.** Blue color represents  
47 MoS<sub>2</sub>, green color represents BN and yellow color represents the electrodes.

48

49

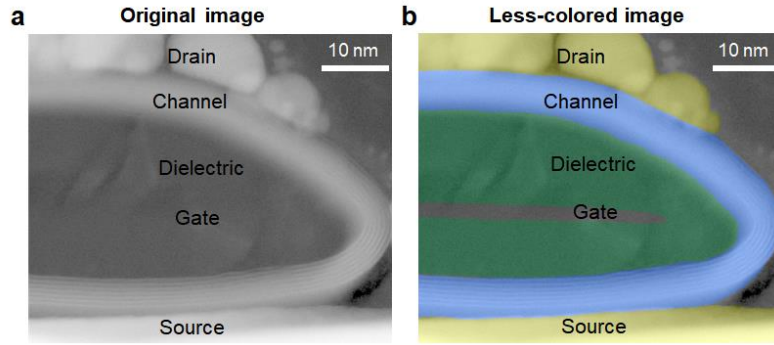

50

51 **Supplementary Fig. 5. TEM image of self-aligned device. a**, Original TEM image of the  
 52 self-aligned device. **b**, Corresponding TEM image with less false-coloring.

53

54

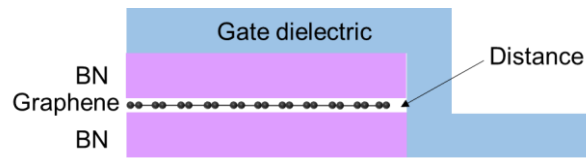

55

56 **Supplementary Fig. 6. Graphene side gate structure (BN/graphene/BN) through**  
 57 **conventional layer-by-layer stacking processes.** Within this process, it is hard to  
 58 precisely align the graphene with the edge of BN, resulting in large distance between the  
 59 graphene gate and the BN edge.

60

61

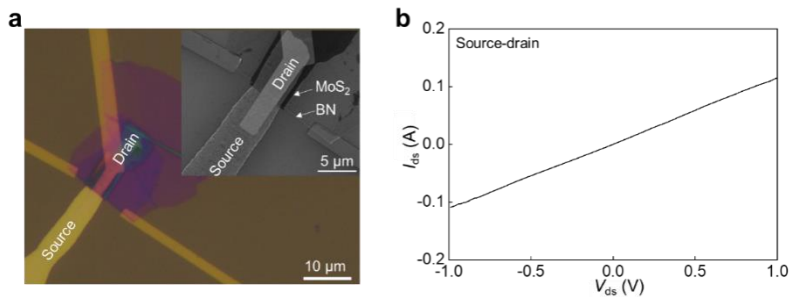

62

63 **Supplementary Fig. 7. Characterization of the tilted angle deposition device. a,** The  
 64 optical image and corresponding SEM image of the folded heterostructure device using  
 65 tilted angle deposition for source-drain contact. **b,** The electrical characteristic of  
 66 corresponding device, showing the short circuit between the source and drain.

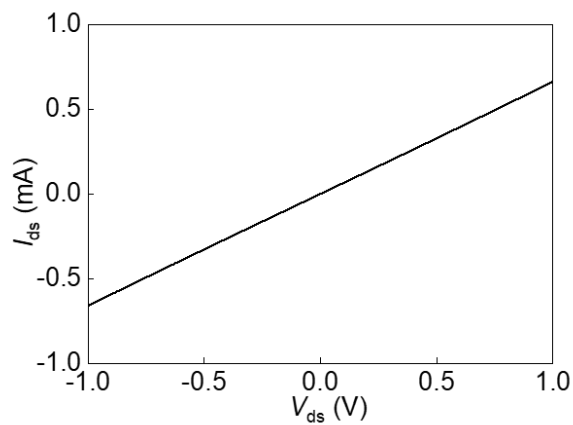

69  
 70 **Supplementary Fig. 8. The conductivity of graphene gate.** The two terminal device  
 71 exhibits low resistance, demonstrating enough conductivity as a gate electrode.

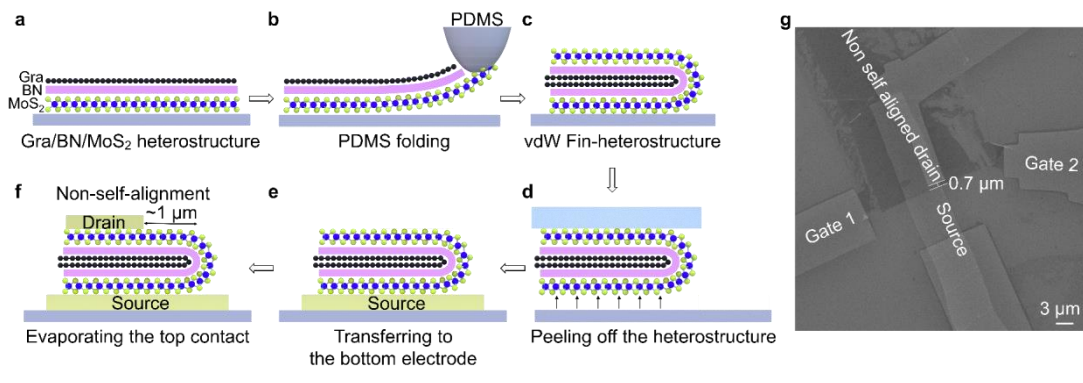

75 **Supplementary Fig. 9. Fabrication processes and characterization of the non-self-**  
 76 **aligned device. a–f**, Fabrication processes of the control device without self-alignment.  
 77 Including six steps: stacking of MoS<sub>2</sub>/BN/graphene heterostructure (**a**), PDMS folding (**b**),  
 78 creation of vdW fin-heterostructure (**c**), peeling-off the vdW fin-heterostructure (**d**),  
 79 transferring the folded heterostructure to the bottom metal (**e**), and defining the top contact  
 80 by electron beam lithography (**f**). **g**, The SEM image of the non-self-aligned device.  
 81  
 82

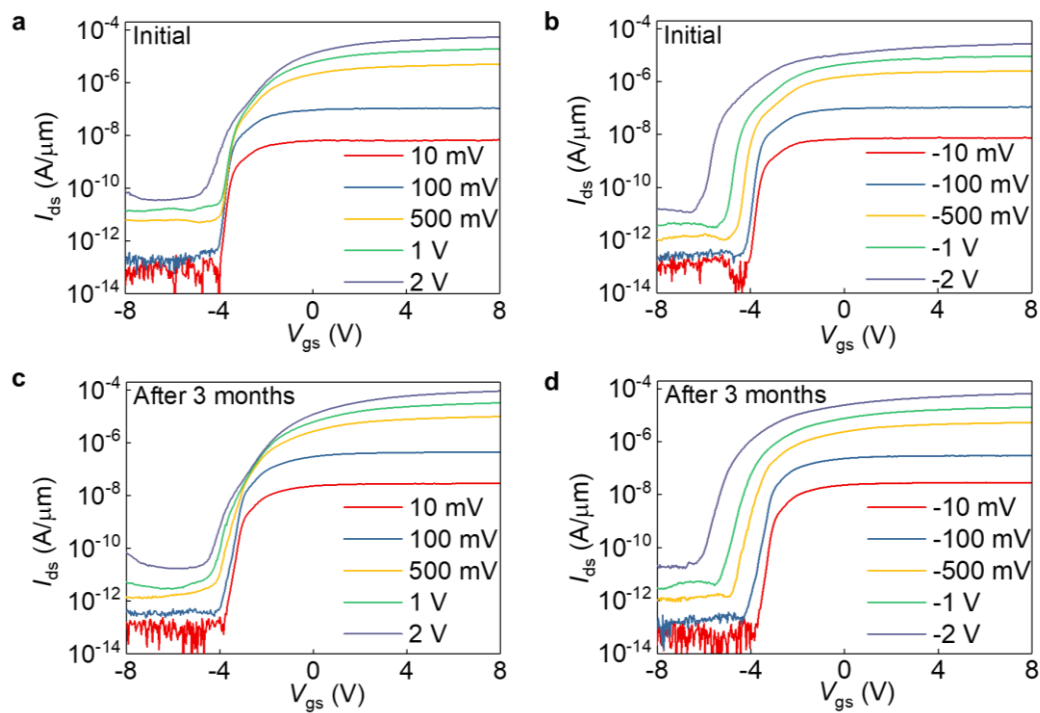

83  
 84 **Supplementary Fig. 10. Stability measurement of a typical self-aligned contact**  
 85 **device. a, b**, Transfer characteristics of an initial self-aligned contact device in both positive  
 86 (**a**) and negative (**b**) bias regions. **c, d**, Transfer characteristics of a self-aligned contact  
 87 device which storing at ambient condition for three months.  
 88  
 89

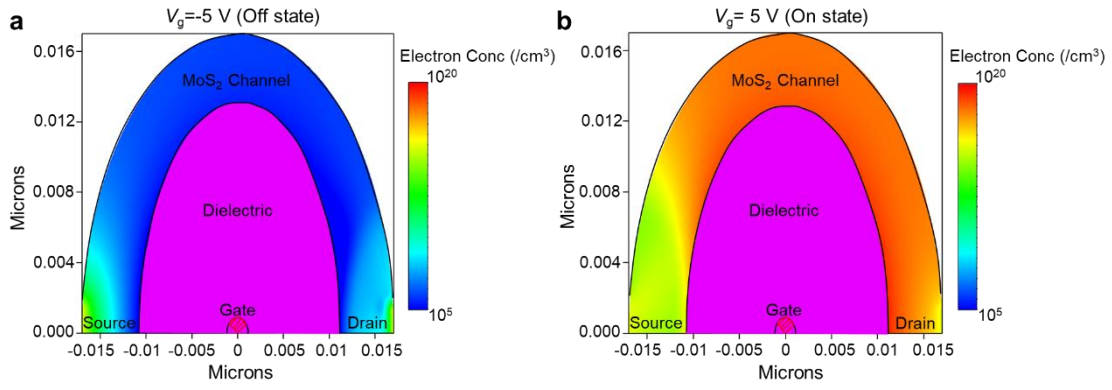

90

91 **Supplementary Fig. 11. The simulated electron density distribution of vertical device.**

92 **a**, The electron density distribution of the MoS<sub>2</sub> channel at off-state. **b**, The electron density

93 distribution of the MoS<sub>2</sub> channel at on-state.

94

95

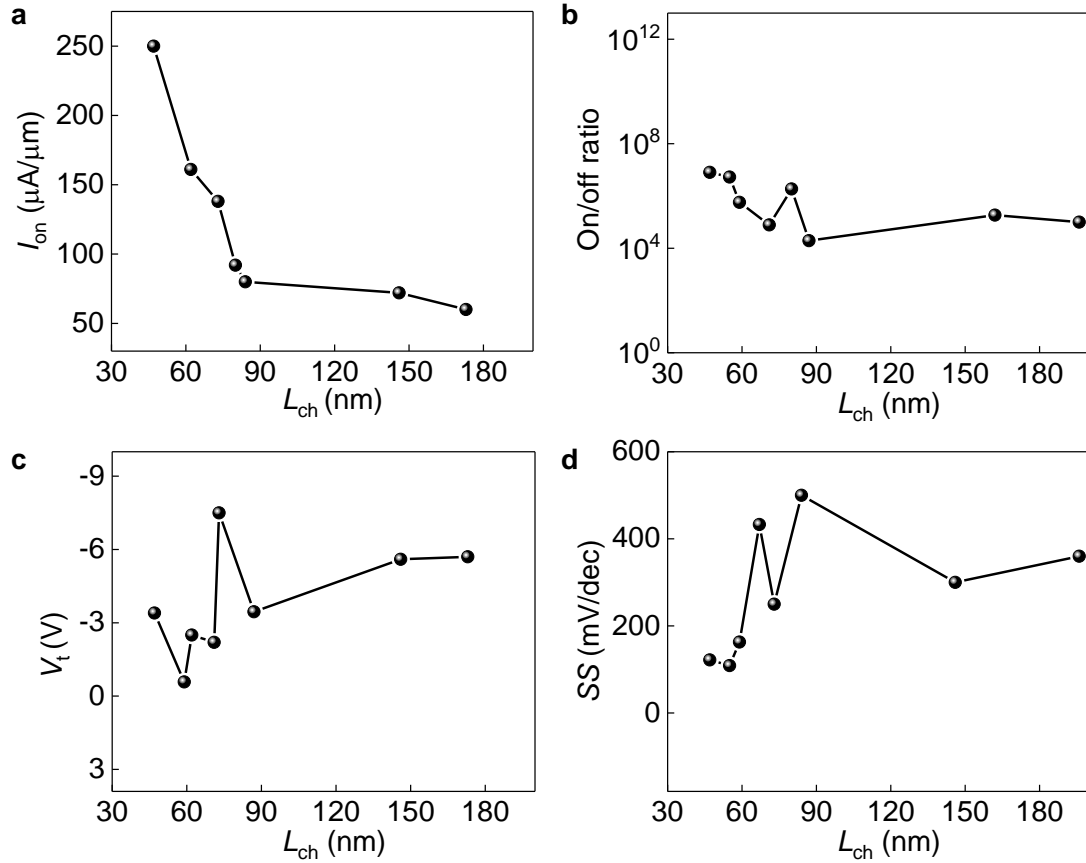

96

97 **Supplementary Fig. 12. The electrical performance of self-aligned devices as a**  
98 **function of channel length. a,** The on-state current density of the self-aligned devices  
99 with the relationship of channel length. **b,** The on-off ratio of the self-aligned devices with  
100 the relationship of channel length. **c,** The threshold voltage of the self-aligned devices with  
101 the relationship of channel length. **d,** The subthreshold swing of the self-aligned devices  
102 with the relationship of channel length. The channel length ( $L_{ch}$ ) here is extracted by  
103 calculating the distance between edges of source and drain along the curvature.

104

105

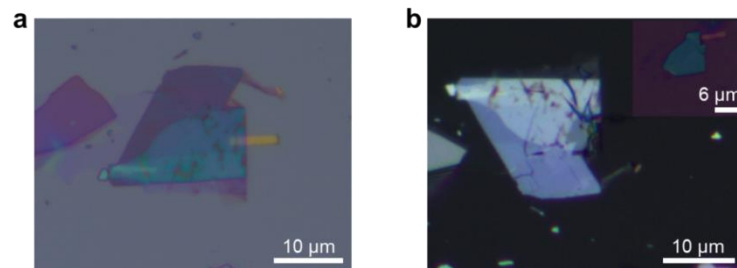

106

107 **Supplementary Fig.13. Self-aligned process for thinner heterostructure. a,** Optical  
108 image of the thinner heterostructure (~25 nm thick after folding) with top contact deposited.  
109 **b,** Optical image of the structure peeling from substrate, where part of the flake is left at  
110 the original substrate owing to the similar thickness of the heterostructure and the top  
111 contact metal.

112

113



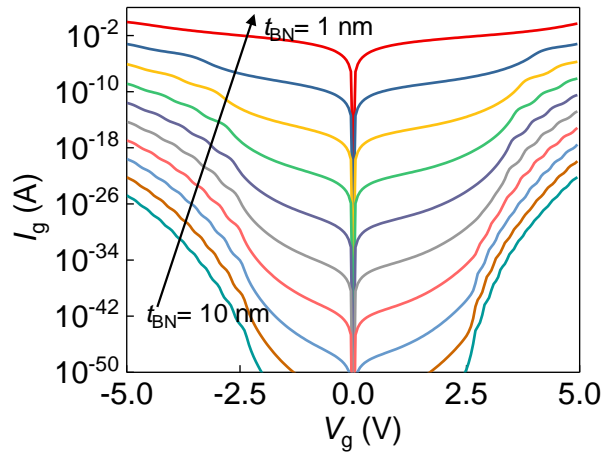

114

115 **Supplementary Fig. 14.** The simulation results of gate leakage currents with different

116 **BN thickness from 1 nm to 10 nm.**

117

118

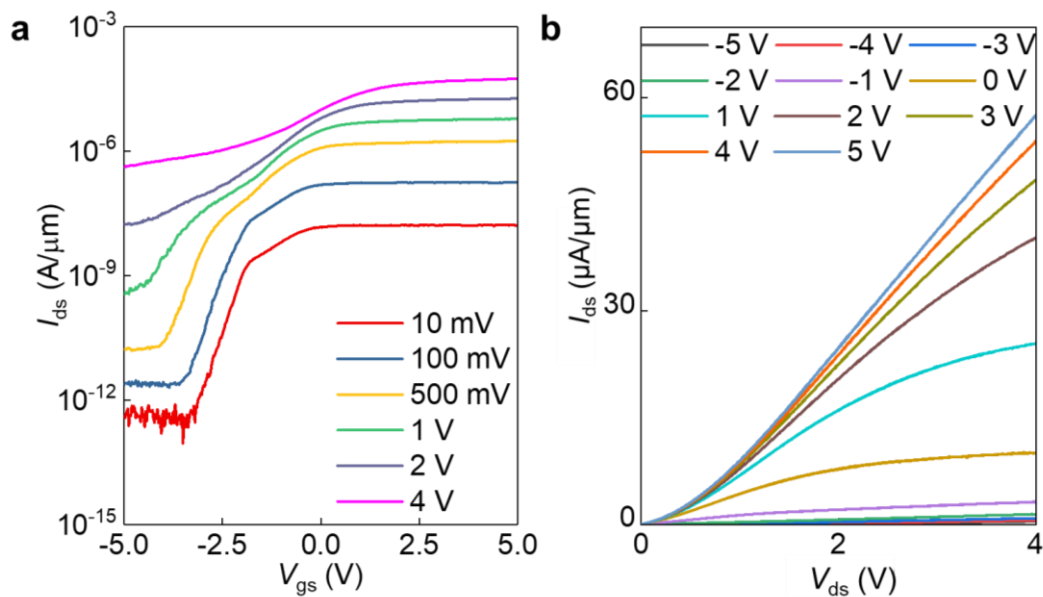

119

120 **Supplementary Fig. 15.** Self-aligned device operated on the SiO<sub>2</sub>. **a**,  $I_{ds}$ - $V_{gs}$  transfer

121 characteristics of a self-aligned device on SiO<sub>2</sub>. **b**,  $I_{ds}$ - $V_{ds}$  output characteristics of a self-

122 aligned device on SiO<sub>2</sub>. The thickness of MoS<sub>2</sub> is 14 layers, channel length is around 80

123 nm.
